# Supplementary material for: Field evaluation of a blood based test for active tuberculosis in endemic settings
Source: PubMed Central journal article supplement (PMC5381859; doi:10.1371/journal.pone.0173359), 2017-04-05

## S2 Fig

### Anti-*M. tb.* antibody levels in TB patients compared to controls.

#### A. AFB<sup>-</sup>/Culture<sup>+</sup> Vs. Healthy

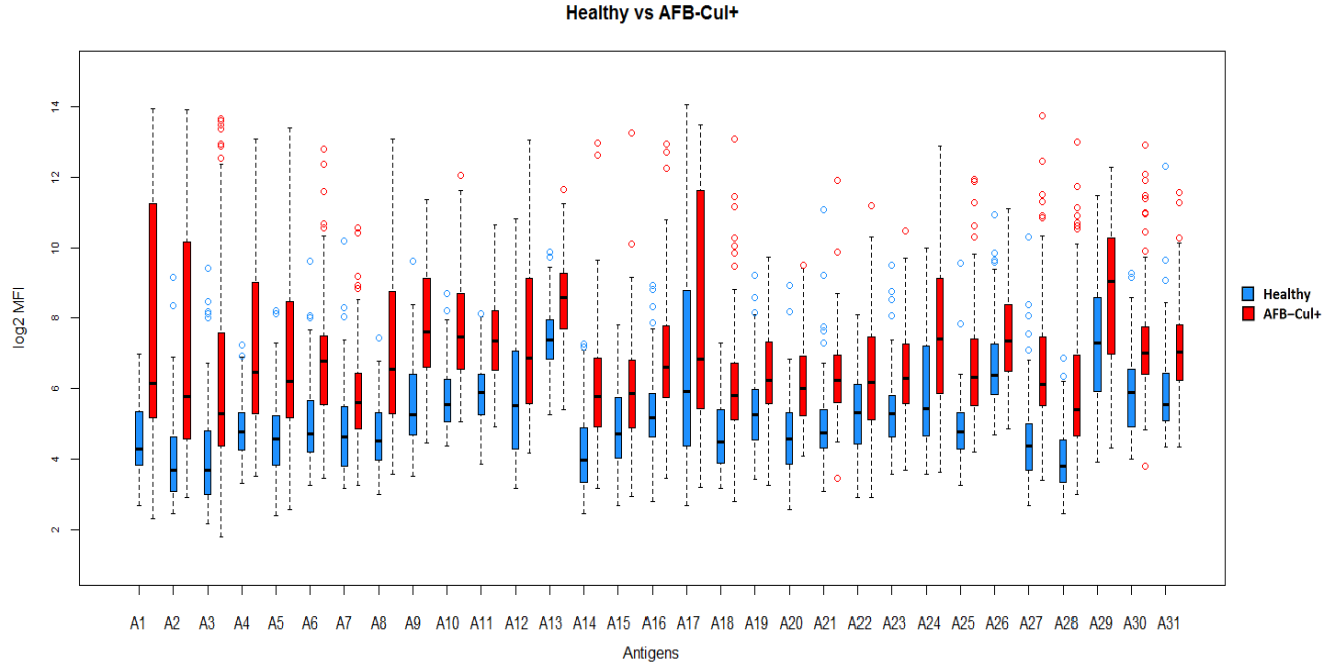

#### B. AFB<sup>-</sup>/Culture<sup>+</sup> Vs. COPD

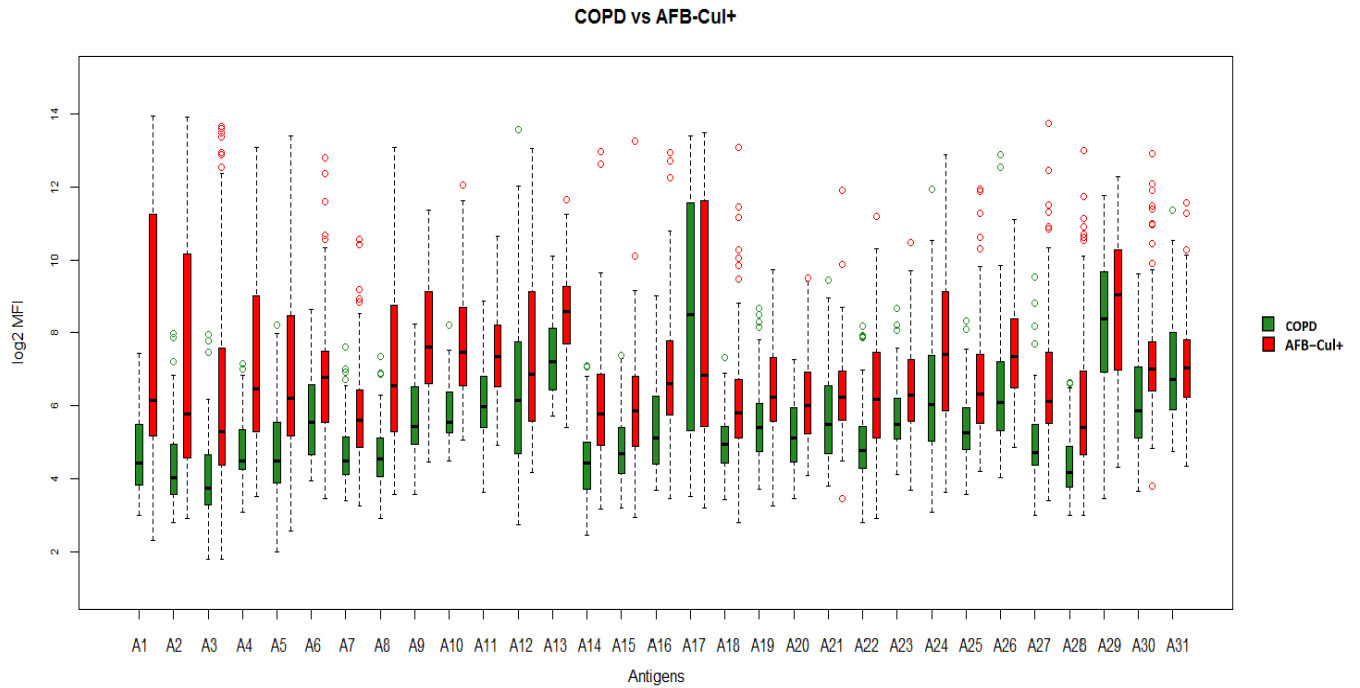

Supplement: pone.0173359.s007.pdf [file pone.0173359.s007.pdf]
