# Supplementary material for: Field evaluation of a blood based test for active tuberculosis in endemic settings
Source: PubMed Central journal article supplement (PMC5381859; doi:10.1371/journal.pone.0173359), 2017-04-05

### S3 Fig

Anti-*M. tb.* antibody levels in TB patients compared to controls.

#### A. AFB-/Culture<sup>-</sup> Vs. Healthy

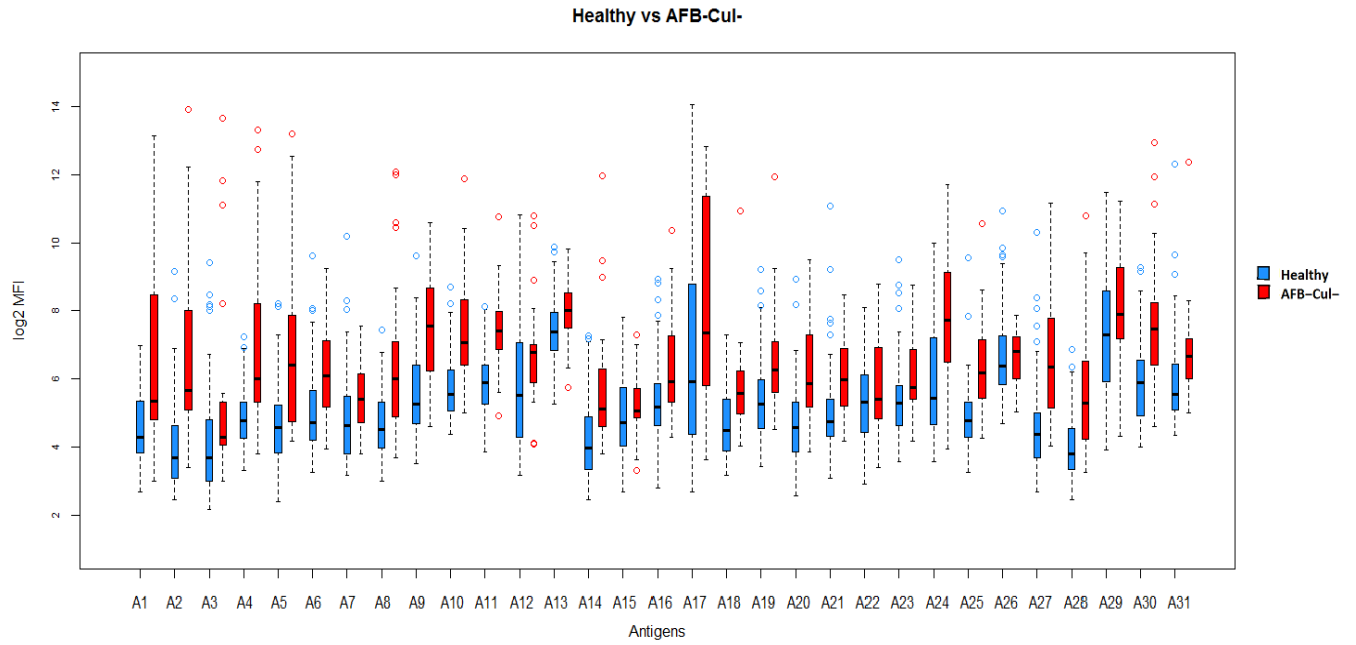

#### B. AFB-/Culture<sup>-</sup> Vs. COPD

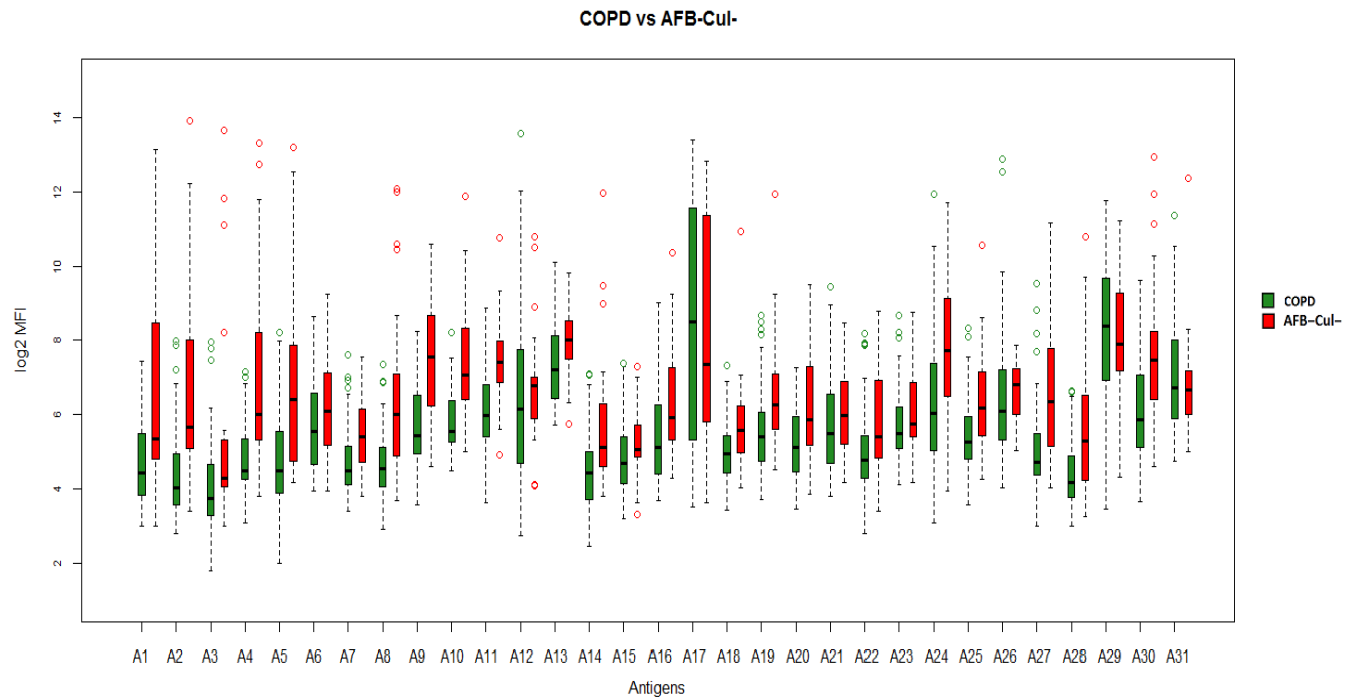

Supplement: pone.0173359.s008.pdf [file pone.0173359.s008.pdf]
